# Supplementary material for: Design of enzyme-immobilized polymer brush-grafted magnetic nanoparticles for efficient nematicidal activity
Source: Royal Society of Chemistry journal article supplement (doi:10.1039/c5ra10063a), 2015-01-01
Supplement: c5ra10063a1.pdf [file c5ra10063a1.pdf]

## Supporting Information

for

### Design of enzyme immobilized polymer-brush-grafted magnetic nanoparticles for efficient degradation of biomaterials

A. Butt, A. Farrukh, A. Ghaffar, H. Duran, Zehra Oluz, H. ur Rehman, T. Hussain, R. Ahmad, A. Tahir, and B. Yameen\*

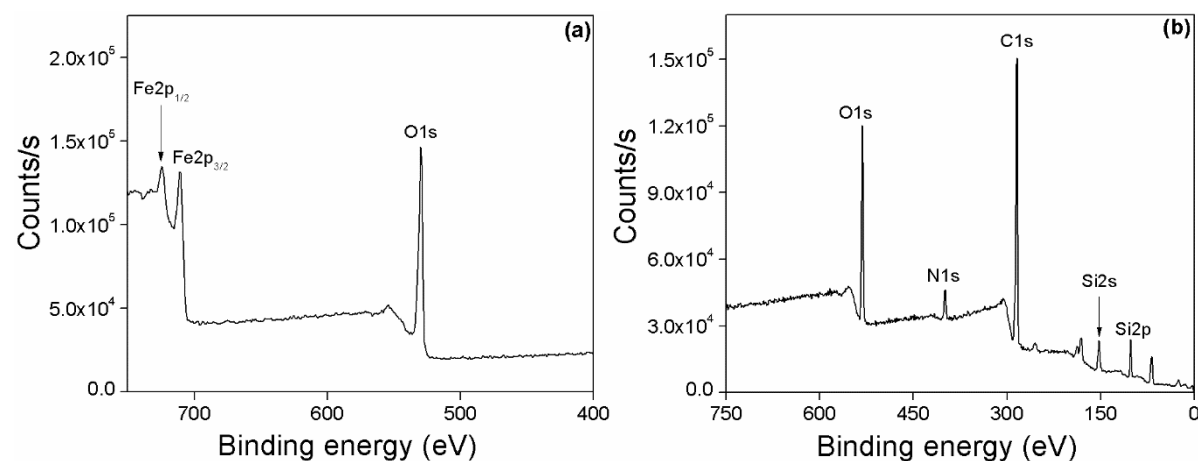

**Figure SI-1:** XPS survey scan of bare MNPs (a) and MNPs-NH<sub>2</sub> (b).

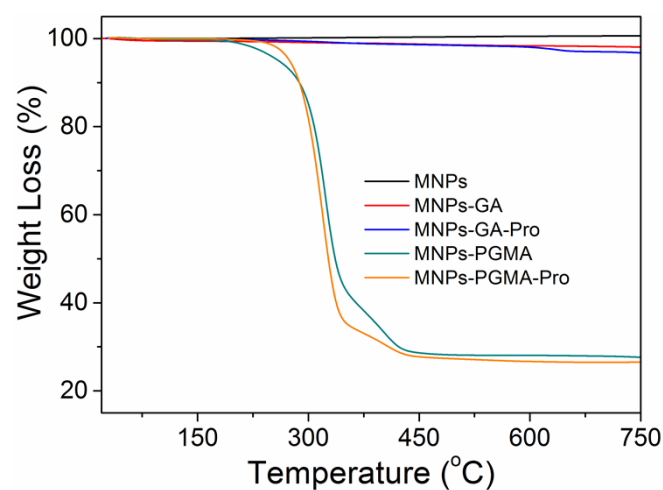

**Figure SI-2:** Thermograms of bare MNPs, MNPs-GA, MNPs-GA-Pro, MNPs-PGMA, and MNPs-PGMA-Pro.

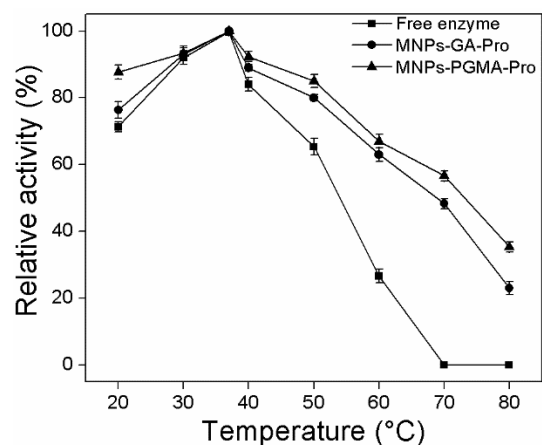

**Figure SI-3:** Effect of temperature on the activity of free and immobilized protease enzyme.

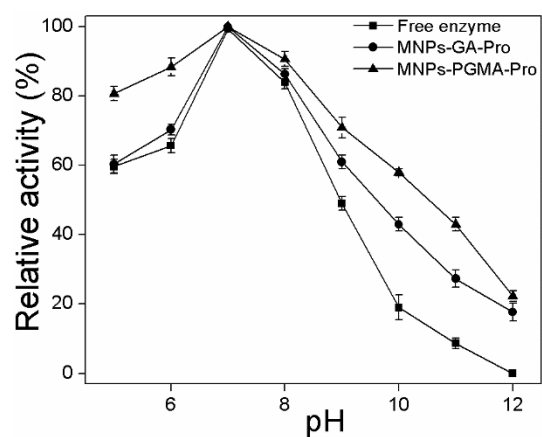

**Figure SI-4:** Effect of pH on the activity of free and immobilized protease enzyme (against casein)

**Table SI-1:** Mortality rate (%) of nematodes with *Haemonchus contortus* (mean of three experiments).

| Sample        | Activity U/mL | Mortality rate (%) |           |           |          |
|---------------|---------------|--------------------|-----------|-----------|----------|
|               |               | 12 h               | 24 h      | 36 h      | 48 h     |
| Control*      | 0             | 0                  | 0         | 1 ± 0     | 1 ± 0    |
| Bare MNPs     | 0             | 0                  | 3 ± 0.50  | 3 ± 0.50  | 12 ± 0.5 |
| MNPs-GA       | 0             | 0                  | 2 ± 1.50  | 5 ± 1.50  | 16 ± 0.1 |
| MNPs-GA-Pro   | 45.27 ± 0.07  | 32 ± 0.50          | 44 ± 2.00 | 62 ± 0.50 | 84 ± 0.2 |
| MNPs-PGMA-Pro | 47.6 ± 0.63   | 54 ± 2.60          | 78 ± 0.50 | 94 ± 1.70 | 94 ± 1.0 |

\* Sample without enzyme

**Table SI-2:** Charge and hydrodynamic radius of MNPs

| <b>Sample</b> | <b>Zeta Potential (mV)</b> | <b>Hydrodynamic Radius (nm)</b> |
|---------------|----------------------------|---------------------------------|
| MNPs-GA       | $-11.67 \pm 1.13$          | $3407 \pm 135$                  |
| MNPs-GA-Pro   | $-14.11 \pm 1.02$          | $281 \pm 22$                    |
| MNPs-PGMA     | $-10.24 \pm 0.75$          | $6118 \pm 174$                  |
| MNPs-PGMA-Pro | $-17.20 \pm 1.05$          | $651 \pm 64$                    |

**References:**

- 1 C.E McDonald and L. L. Chen, *Anal Biochem* 1965, **10**, 175.
